# Supplementary material
Source: PubMed Central journal article supplement (PMC3050603)
Supplement: es702316k_si_001.pdf [file es702316k_si_001.pdf]

| Profile | Latitude | Longitude | Depth (ft) | As (ug/L) | Fe (mg/L) | Mn (mg/L) | S (mg/L) | Na (mg/L) | Mg (mg/L) | Si (mg/L) | K (mg/L) | Ca (mg/L) | Fe(II)/Fe | As (mg/kg) | P-ext | As (mg/kg) |
|---------|----------|-----------|------------|-----------|-----------|-----------|----------|-----------|-----------|-----------|----------|-----------|-----------|------------|-------|------------|
| NS06/36 | 23.788   | 90.612    | 10         | 2.4       | 0.01      | 0.02      | 2.52     | 9.3       | 5.8       | 26.8      | 1.6      | 7.2       | 0.18      |            |       |            |
|         |          |           | 15         | 2.5       | 0.05      | 0.03      | 1.16     | 8.8       | 5.3       | 23.5      | 3.1      | 10.8      | 0.28      |            | 0.21  |            |
|         |          |           | 20         | 3.7       | 0.02      | 0.02      | 3.93     | 7.2       | 6.7       | 19.3      | 6.2      | 11.3      | 0.30      |            | 0.24  |            |
|         |          |           | 25         | 2.4       | 0.01      | 0.26      | 0.80     | 5.9       | 6.0       | 19.1      | 10.7     | 10.5      | 0.37      |            | 0.41  |            |
|         |          |           | 30         | 2.7       | 0.01      | 0.87      | 0.70     | 6.9       | 10.5      | 20.8      | 14.8     | 15.5      | 0.36      |            | 0.32  |            |
|         |          |           | 35         | 3.5       | 0.02      | 1.48      | 0.95     | 7.3       | 10.4      | 19.0      | 16.6     | 17.7      | 0.40      |            | 0.19  |            |
|         |          |           | 40         | 6.5       | 0.25      | 2.61      | 2.52     | 11.8      | 7.6       | 17.4      | 8.9      | 17.8      | 0.67      |            | 0.09  |            |
|         |          |           | 45         | 8.4       | 1.44      | 2.96      | 4.53     | 12.4      | 9.6       | 18.5      | 6.6      | 21.2      | 0.70      |            | 0.09  |            |
|         |          |           | 55         | 62.9      | 8.95      | 3.79      | 13.83    | 21.9      | 21.8      | 22.1      | 5.1      | 63.8      | 0.81      |            | 0.52  |            |
| NS07/37 | 23.775   | 90.593    | 20         | 39.3      | 17.58     | 1.47      | 193.02   | 328.2     | 232.2     | 21.5      | 21.0     | 421.2     | 0.83      |            | 0.15  |            |
|         |          |           | 25         | 224.4     | 8.38      | 3.15      | 0.22     | 37.8      | 42.5      | 23.1      | 5.1      | 127.4     | 0.86      |            | 0.49  |            |
|         |          |           | 30         | 239.0     | 0.16      | 3.71      | 0.60     | 21.7      | 29.3      | 22.7      | 4.4      | 99.8      | 0.61      |            | 0.78  |            |
|         |          |           | 35         | 253.5     | 0.01      | 0.47      | 5.09     | 26.6      | 30.9      | 20.5      | 15.7     | 64.9      | 0.41      |            | 0.89  |            |
|         |          |           | 40         | 468.0     | 0.05      | 1.91      | 1.41     | 22.4      | 22.0      | 19.6      | 7.1      | 70.4      | 0.51      |            | 1.26  |            |
|         |          |           | 45         | 609.4     | 2.80      | 2.31      | 0.14     | 34.8      | 17.1      | 12.2      | 5.7      | 62.6      | 0.77      |            | 0.81  |            |
|         |          |           | 50         | 200.6     | 0.02      | 0.36      | 4.71     | 38.0      | 24.7      | 18.5      | 16.4     | 52.6      | 0.66      |            | 1.05  |            |
|         |          |           | 70         | 279.1     | 1.56      | 0.36      | 0.37     | 118.8     | 21.4      | 18.3      | 10.4     | 37.0      | 0.86      |            | 0.52  |            |
| NS19    | 25.911   | 88.533    | 60         | 26.7      | 3.0       | 0.20      | 0.4      | 11.0      | 4.2       | 15.1      | 2.7      | 17.1      | 0.78      | 0.38       | 0.05  |            |
|         |          |           | 70         | 9.8       | 2.8       | 0.13      | 0.5      | 9.6       | 2.0       | 19.1      | 2.6      | 7.7       | 0.65      | 0.37       |       |            |
|         |          |           | 80         | 4.1       | 0.2       | 0.17      | 0.7      | 9.7       | 2.6       | 19.9      | 8.9      | 10.1      | 0.82      | 0.11       | 0.02  |            |
|         |          |           | 90         | 4.0       | 0.1       | 0.16      | 0.6      | 9.6       | 2.4       | 21.4      | 7.5      | 10.5      | 0.86      | 0.04       | 0.01  |            |
|         |          |           | 100        | 12.3      | 15.4      | 0.52      | 0.7      | 10.9      | 3.8       | 26.6      | 9.4      | 13.7      | 0.93      | 0.11       | 0.02  |            |
|         |          |           | 110        | 14.2      | 38.3      | 0.39      | 0.3      | 9.8       | 2.8       | 26.3      | 3.1      | 12.6      | 0.72      | 0.10       |       |            |
| NS20    | 25.867   | 88.36     | 30         | 1.0       | 0.0       | 0.05      | 2.4      | 5.5       | 2.3       | 9.99      | 4.0      | 14.9      | 0.62      | 0.15       | 0.07  |            |
|         |          |           | 40         | 1.6       | 0.1       | 0.26      | 1.5      | 8.8       | 5.3       | 17.20     | 12.8     | 15.0      | 0.53      | 0.14       | 0.10  |            |
|         |          |           | 50         | 1.2       | 0.0       | 0.09      | 0.7      | 5.7       | 3.6       | 18.06     | 6.0      | 7.8       | 0.64      | 0.15       | 0.10  |            |
|         |          |           | 60         | 2.0       | 0.2       | 0.21      | 1.2      | 7.5       | 5.3       | 17.97     | 12.7     | 10.7      | 0.54      | 0.09       | 0.08  |            |
|         |          |           | 70         | 1.0       | 0.1       | 0.12      | 1.1      | 7.2       | 5.6       | 17.24     | 7.0      | 7.2       | 0.62      | 0.08       | 0.05  |            |
|         |          |           | 80         | 1.4       | 4.0       | 0.07      | 1.3      | 6.2       | 2.8       | 18.92     | 5.1      | 4.6       | 0.62      | 0.04       | 0.01  |            |
|         |          |           | 90         | 1.1       | 5.1       | 0.16      | 1.2      | 7.2       | 3.9       | 18.35     | 4.5      | 6.7       | 0.75      | 0.04       | 0.01  |            |
|         |          |           | 100        | 4.1       | 9.7       | 0.42      | 0.3      | 9.1       | 3.1       | 22.06     | 3.4      | 8.8       | 0.66      | 0.09       | 0.01  |            |
| NS21    | 23.076   | 90.828    | 11         | 110.8     | 2.3       | 1.66      | 0.3      | 33.9      | 36.9      | 32.7      | 14.4     | 83.3      | 0.58      | 3.1        | 1.94  |            |
|         |          |           | 15         | 787.4     | 0.0       | 0.29      | 0.3      | 25.1      | 32.8      | 10.1      | 11.3     | 63.4      | 0.74      | 10.7       | 7.11  |            |
|         |          |           | 20         | 919.3     | 0.7       | 0.15      | 0.3      | 177.4     | 14.6      | 13.3      | 11.2     | 27.8      | 0.77      | 3.8        | 4.04  |            |
|         |          |           | 25         | 758.4     | 7.1       | 0.74      | 0.5      | 587.5     | 55.5      | 15.6      | 20.0     | 152.4     | 0.77      | 3.5        | 3.01  |            |
|         |          |           | 35         | 498.0     | 20.5      | 0.31      | 0.6      | 667.0     | 57.1      | 23.3      | 17.3     | 178.3     | 0.81      | 3.0        | 1.58  |            |
|         |          |           | 40         | 422.7     | 17.1      | 0.21      | 0.5      | 575.7     | 45.4      | 25.6      | 15.1     | 147.2     | 0.83      | 3.6        | 2.05  |            |
|         |          |           | 62         | 459.2     | 14.3      | 0.21      | 0.5      | 651.0     | 74.3      | 23.6      | 16.5     | 130.4     | 0.85      | 3.2        | 1.16  |            |
|         |          |           | 75         | 398.1     | 4.2       | 0.11      | 0.5      | 892.6     | 113.6     | 24.5      | 21.9     | 130.9     | 0.80      | 1.1        | 0.86  |            |
| NS23    | 23.078   | 90.828    | 14         | 93.6      | 18.8      | 0.44      | 0.3      | 9.1       | 12.2      | 18.8      | 5.0      | 20.8      | 0.82      | 1.4        | 0.71  |            |
|         |          |           | 20         | 100.4     | 6.4       | 0.44      | 0.3      | 7.0       | 10.6      | 19.1      | 4.6      | 20.7      | 0.81      | 1.1        | 0.80  |            |
|         |          |           | 30         | 487.5     | 6.8       | 0.16      | 0.2      | 35.8      | 19.4      | 18.4      | 7.7      | 34.6      | 0.83      | 2.0        | 1.04  |            |
|         |          |           | 45         | 665.9     | 11.0      | 0.16      | 0.4      | 358.1     | 42.4      | 21.0      | 13.0     | 90.2      | 0.79      | 1.3        | 0.83  |            |
|         |          |           | 55         | 745.3     | 13.8      | 0.26      | 0.4      | 535.3     | 54.4      | 17.6      | 15.1     | 102.3     | 0.75      | 1.7        | 1.43  |            |
|         |          |           | 66         | 539.1     | 10.5      | 0.18      | 0.5      | 721.8     | 82.5      | 21.8      | 16.7     | 123.0     | 0.95      | 5.1        | 1.75  |            |
