# Supplementary material
Source: PubMed Central journal article supplement (PMC3050603)
Supplement: es702316k_si_002.pdf [file es702316k_si_002.pdf]

November 28, 2007  
Lab no. 207862

Mr. Alexander Van Geen  
Columbia University  
Lamont-Doherty Earth Observatory  
61 Route 9W, P.O. Box 1000  
Palisades, New York 10964

Dear Mr. Van Geen:

Enclosed are the x-ray fluorescence (XRF) and x-ray diffraction (XRD) analytical results for your 18, "Sediment Samples from Bangladesh." Also enclosed are the raw XRD data in graph format, as requested. This report will be mailed and emailed to you. The raw data will be mailed with the report. The analyses will be charged to Karen Hoffer's VISA card, as requested.

A representative portion of each sample was ground to approximately -400 mesh in a steel swing mill and then analyzed by our standard XRF procedure for 31 major, minor and trace elements. The relative precision/accuracy for this procedure is ~5-10% for major-minor elements and ~10-15% for trace elements (those elements listed in ppm) at levels greater than twice the detection limit in samples of average geologic composition. A replicate sample and a standard reference material ("SY3", a CANMET standard rock) were analyzed with the samples to demonstrate analytical reproducibility for your samples and analytical accuracy for a geologic standard, respectively. The accepted ("known") values for the quality control standard are listed with the XRF results.

A representative portion of each ground sample was packed into a well-type plastic holder and then scanned with the diffractometer over the range, 3-61° 2θ using Cu-Kα radiation. The results of the scans are summarized as approximate mineral weight percents on the enclosed table. Estimates of mineral concentrations were made using our XRF-determined elemental compositions and the relative peak heights/areas on the XRD scans. The detection limit for an average mineral in these samples is ~1-3% and the analytical reproducibility is approximately equal to the square root of the amount. "Unidentified" accounts for that portion of the XRD scan which could not be resolved and a "?" indicates doubt in both mineral identification and amount.

Thank you for the opportunity to be of continuing service to Lamont-Doherty.

Sincerely,

Peggy Dalheim

| Ident                                                                                                     | -----             |      |                                |                  |                               |       | Wt %   | -----            |      |                  |      |                                |      |
|-----------------------------------------------------------------------------------------------------------|-------------------|------|--------------------------------|------------------|-------------------------------|-------|--------|------------------|------|------------------|------|--------------------------------|------|
|                                                                                                           | Na <sub>2</sub> O | MgO  | Al <sub>2</sub> O <sub>3</sub> | SiO <sub>2</sub> | P <sub>2</sub> O <sub>5</sub> | S     | Cl     | K <sub>2</sub> O | CaO  | TiO <sub>2</sub> | MnO  | Fe <sub>2</sub> O <sub>3</sub> | BaO  |
| NS19 60'                                                                                                  | 1.27              | 0.57 | 10.4                           | 83.7             | 0.07                          | <0.05 | <0.02  | 2.45             | 0.43 | 0.18             | 0.03 | 1.96                           | 0.04 |
| NS19 70'                                                                                                  | 1.57              | 0.59 | 10.2                           | 83.1             | <0.05                         | <0.05 | <0.02  | 2.40             | 0.53 | 0.18             | 0.03 | 1.78                           | 0.04 |
| NS19 80'                                                                                                  | 1.45              | 0.63 | 8.65                           | 85.3             | <0.05                         | <0.05 | <0.02  | 1.92             | 0.36 | 0.17             | 0.03 | 1.87                           | 0.04 |
| NS20 20'                                                                                                  | 1.63              | 0.60 | 10.3                           | 83.5             | 0.05                          | <0.05 | <0.02  | 2.31             | 0.67 | 0.19             | 0.04 | 1.75                           | 0.04 |
| NS20 50'                                                                                                  | 1.76              | 0.67 | 10.8                           | 81.8             | 0.06                          | <0.05 | <0.02  | 2.52             | 0.81 | 0.22             | 0.05 | 1.87                           | 0.04 |
| NS20 60'                                                                                                  | 1.84              | 0.61 | 10.6                           | 82.8             | <0.05                         | <0.05 | <0.02  | 2.69             | 0.73 | 0.19             | 0.03 | 1.53                           | 0.05 |
| NS21 30-35'                                                                                               | 1.88              | 1.81 | 12.7                           | 74.7             | 0.34                          | <0.05 | 0.02   | 2.44             | 1.78 | 0.60             | 0.09 | 4.59                           | 0.05 |
| NS21 35-40'                                                                                               | 1.86              | 2.06 | 12.8                           | 73.7             | 0.18                          | <0.05 | <0.02  | 2.56             | 1.75 | 0.65             | 0.09 | 5.11                           | 0.05 |
| NS21 70-75'                                                                                               | 2.00              | 1.56 | 11.0                           | 76.9             | 0.21                          | <0.05 | <0.02  | 1.96             | 2.36 | 0.64             | 0.09 | 3.95                           | 0.04 |
| NS23 25-30'                                                                                               | 1.92              | 1.50 | 11.7                           | 76.5             | 0.18                          | <0.05 | <0.02  | 2.44             | 1.88 | 0.57             | 0.08 | 3.88                           | 0.05 |
| NS23 42-45'                                                                                               | 1.95              | 1.49 | 10.6                           | 77.6             | 0.20                          | <0.05 | <0.02  | 1.95             | 2.40 | 0.58             | 0.08 | 3.78                           | 0.04 |
| NS23 55-60'                                                                                               | 1.90              | 1.41 | 11.1                           | 77.2             | 0.14                          | <0.05 | <0.02  | 2.34             | 1.90 | 0.48             | 0.08 | 4.00                           | 0.05 |
| NS36 25'                                                                                                  | 2.13              | 1.16 | 11.2                           | 78.3             | 0.09                          | <0.05 | <0.02  | 2.38             | 1.71 | 0.37             | 0.06 | 2.99                           | 0.05 |
| NS36 45'                                                                                                  | 1.83              | 1.21 | 10.9                           | 78.4             | 0.11                          | <0.05 | <0.02  | 2.20             | 1.81 | 0.47             | 0.08 | 3.60                           | 0.05 |
| NS36 52'                                                                                                  | 1.74              | 1.09 | 10.4                           | 76.9             | 0.15                          | <0.05 | <0.02  | 2.04             | 2.03 | 0.51             | 0.12 | 5.83                           | 0.04 |
| NS37 35'                                                                                                  | 2.11              | 1.33 | 11.3                           | 77.7             | 0.14                          | <0.05 | <0.02  | 2.28             | 1.96 | 0.43             | 0.07 | 3.25                           | 0.05 |
| NS37 45'                                                                                                  | 2.06              | 1.65 | 12.3                           | 75.6             | 0.20                          | <0.05 | <0.02  | 2.47             | 1.86 | 0.49             | 0.09 | 3.99                           | 0.05 |
| NS37 65'                                                                                                  | 1.95              | 2.39 | 13.3                           | 72.2             | 0.18                          | <0.05 | <0.02  | 2.61             | 1.98 | 0.67             | 0.10 | 5.45                           | 0.05 |
| <b>Quality Control - Replicate (R) sample and standard reference material (SY3) analyzed with samples</b> |                   |      |                                |                  |                               |       |        |                  |      |                  |      |                                |      |
| NS19 60' (R)                                                                                              | 1.32              | 0.57 | 10.3                           | 83.8             | 0.07                          | <0.05 | <0.02  | 2.43             | 0.43 | 0.18             | 0.03 | 2.01                           | 0.04 |
| SY3-XRF                                                                                                   | 4.19              | 2.40 | 12.6                           | 60.9             | 0.74                          | <0.05 | <0.02  | 4.06             | 8.25 | 0.12             | 0.33 | 6.33                           | 0.05 |
| SY3-known                                                                                                 | 4.15              | 2.67 | 11.8                           | 59.7             | 0.54                          | 0.05  | 0.014? | 4.20             | 8.26 | 0.15             | 0.32 | 6.45                           | 0.05 |

Analysis Performed By The Mineral Lab, Inc

| Ident        | ----- PPM ----- |     |     |     |     |     |     |     |     |     |     |
|--------------|-----------------|-----|-----|-----|-----|-----|-----|-----|-----|-----|-----|
|              | V               | Cr  | Ni  | Cu  | Zn  | As  | Sn  | Pb  | Mo  | Sr  | U   |
| NS19 60'     | 28              | 19  | <10 | <10 | 18  | <20 | <50 | 20  | <10 | 71  | 20  |
| NS19 70'     | 27              | 19  | <10 | <10 | 20  | <20 | <50 | 25  | <10 | 76  | 32  |
| NS19 80'     | 24              | 16  | <10 | <10 | 19  | <20 | <50 | 21  | <10 | 77  | 26  |
| NS20 20'     | 25              | 16  | <10 | <10 | 15  | <20 | <50 | 19  | <10 | 77  | 29  |
| NS20 50'     | 28              | 18  | <10 | <10 | 20  | <20 | <50 | 23  | <10 | 85  | 29  |
| NS20 60'     | 27              | 17  | <10 | <10 | 19  | <20 | <50 | 27  | <10 | 90  | 18  |
| NS21 30-35'  | 77              | 68  | 28  | 16  | 53  | <20 | 98  | 21  | <10 | 170 | 32  |
| NS21 35-40'  | 81              | 74  | 34  | 14  | 63  | <20 | 113 | 21  | <10 | 169 | 40  |
| NS21 70-75'  | 80              | 78  | 17  | <10 | 41  | <20 | 90  | 19  | <10 | 189 | 40  |
| NS23 25-30'  | 67              | 63  | 20  | 13  | 43  | <20 | 86  | 19  | <10 | 169 | 26  |
| NS23 42-45'  | 75              | 63  | 18  | <10 | 39  | <20 | 86  | 16  | <10 | 182 | 30  |
| NS23 55-60'  | 68              | 58  | 21  | <10 | 45  | <20 | 86  | 20  | <10 | 182 | 28  |
| NS36 25'     | 58              | 45  | 18  | <10 | 35  | <20 | 63  | 21  | <10 | 193 | 25  |
| NS36 45'     | 69              | 70  | 19  | 12  | 47  | <20 | 77  | 20  | <10 | 185 | 29  |
| NS36 52'     | 78              | 85  | 22  | 11  | 41  | <20 | 119 | 25  | <10 | 176 | 35  |
| NS37 35'     | 63              | 51  | 18  | <10 | 43  | <20 | 69  | 19  | <10 | 189 | 21  |
| NS37 45'     | 70              | 58  | 25  | 14  | 61  | <20 | 84  | 20  | <10 | 188 | 33  |
| NS37 65'     | 89              | 72  | 35  | 21  | 84  | <20 | 117 | 18  | <10 | 175 | 34  |
| NS19 60' (R) | 28              | 18  | <10 | <10 | 17  | <20 | <50 | 20  | <10 | 65  | 12  |
| SY3-XRF      | 45              | <10 | <10 | 29  | 262 | <20 | 63  | 128 | <10 | 318 | 639 |
| SY3-known    | 51              | 10  | 11  | 16  | 250 | 20  | --  | 130 | --  | 306 | 650 |

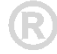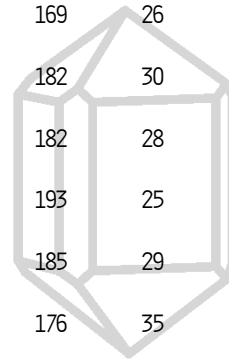

Analysis Performed By The Mineral Lab, Inc

| Ident                  | PPM |     |     |     |     |
|------------------------|-----|-----|-----|-----|-----|
|                        | Th  | Nb  | Zr  | Rb  | Y   |
| NS19 60'               | 28  | 11  | 77  | 122 | 25  |
| NS19 70'               | 39  | 12  | 86  | 130 | 19  |
| NS19 80'               | 33  | 10  | 77  | 91  | 18  |
| NS20 20'               | 32  | 10  | 83  | 109 | 23  |
| NS20 50'               | 36  | 11  | 91  | 124 | 29  |
| NS20 60'               | 27  | 12  | 86  | 127 | 20  |
| NS21 30-35'            | 43  | 16  | 266 | 131 | 41  |
| NS21 35-40'            | 43  | 19  | 296 | 147 | 38  |
| NS21 70-75'            | 59  | 20  | 453 | 95  | 58  |
| NS23 25-30'            | 36  | 16  | 337 | 118 | 37  |
| NS23 42-45'            | 41  | 16  | 308 | 90  | 39  |
| NS23 55-60'            | 40  | 15  | 185 | 121 | 38  |
| NS36 25'               | 40  | 12  | 170 | 107 | 28  |
| NS36 45'               | 34  | 17  | 220 | 101 | 38  |
| NS36 52'               | 42  | 16  | 292 | 88  | 51  |
| NS37 35'               | 42  | 13  | 195 | 113 | 30  |
| NS37 45'               | 29  | 13  | 184 | 132 | 29  |
| NS37 65'               | 35  | 16  | 248 | 147 | 36  |
| <b>Quality Control</b> |     |     |     |     |     |
| NS19 60' (R)           | 14  | <10 | 77  | 120 | 23  |
| SY3-XRF                | 996 | 171 | 361 | 213 | 792 |
| SY3-known              | 990 | 145 | 320 | 208 | 740 |

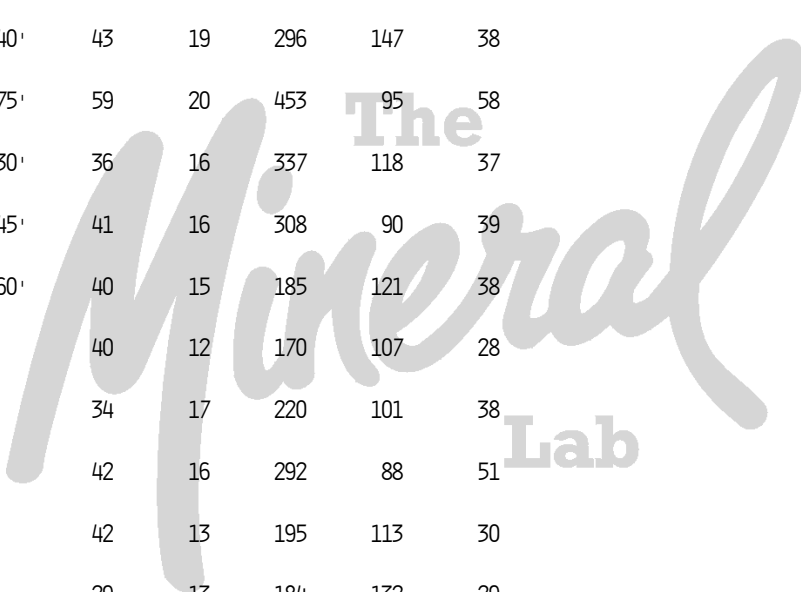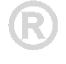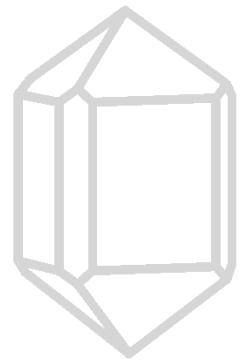

Analysis Performed By The Mineral Lab, Inc

| Mineral Name         | Chemical Formula                                                                          | Approx. Wt % |          |          |          |          |          |
|----------------------|-------------------------------------------------------------------------------------------|--------------|----------|----------|----------|----------|----------|
|                      |                                                                                           | NS19 60'     | NS19 70' | NS19 80' | NS20 20' | NS20 50' | NS20 60' |
| Quartz               | SiO <sub>2</sub>                                                                          | 60           | 63       | 67       | 59       | 57       | 58       |
| Plagioclase feldspar | (Na,Ca)Al(Si,Al) <sub>3</sub> O <sub>8</sub>                                              | 10           | 14       | 13       | 14       | 17       | 18       |
| K-feldspar           | KAlSi <sub>3</sub> O <sub>8</sub>                                                         | 10           | 10       | 9        | 9        | 10       | 11       |
| Mica/illite          | (K,Na,Ca)(Al,Mg,Fe) <sub>2</sub> (Si,Al) <sub>4</sub> O <sub>10</sub> (OH,F) <sub>2</sub> | 10           | 7        | 5        | 10       | 12       | 10       |
| Chlorite             | (Mg,Fe,Al) <sub>6</sub> (Si,Al) <sub>4</sub> O <sub>10</sub> (OH)                         | 7            | <5?      | <5       | 6        | <5       | <5       |
| Clinoamphibole       | Ca <sub>2</sub> (Mg,Fe) <sub>5</sub> Si <sub>8</sub> O <sub>22</sub> (OH) <sub>2</sub>    | <1           | —        | —        | <3       | <2?      | —        |
| Sillimanite          | Al <sub>2</sub> SiO <sub>5</sub>                                                          | <1?          | —        | —        | <1?      | —        | —        |
| "Unidentified"       | ?                                                                                         | <5           | <5       | <5       | <5       | <5       | <5       |

Analysis performed by The Mineral Lab, Inc

| Mineral Name         | Chemical Formula                                                                          | Approx. Wt % |             |             |             |             |             |
|----------------------|-------------------------------------------------------------------------------------------|--------------|-------------|-------------|-------------|-------------|-------------|
|                      |                                                                                           | NS21 30-35'  | NS21 35-40' | NS21 70-75' | NS23 25-30' | NS23 42-45' | NS23 55-60' |
| Quartz               | SiO <sub>2</sub>                                                                          | 48           | 46          | 50          | 51          | 51          | 52          |
| Plagioclase feldspar | (Na,Ca)Al(Si,Al) <sub>3</sub> O <sub>8</sub>                                              | 23           | 21          | 24          | 22          | 25          | 23          |
| K-feldspar           | KAlSi <sub>3</sub> O <sub>8</sub>                                                         | 11           | 10          | 9           | 10          | 9           | 10          |
| Mica/illite          | (K,Na,Ca)(Al,Mg,Fe) <sub>2</sub> (Si,Al) <sub>4</sub> O <sub>10</sub> (OH,F) <sub>2</sub> | 7            | 10          | 5           | 7           | 5           | 7           |
| Chlorite             | (Mg,Fe,Al) <sub>6</sub> (Si,Al) <sub>4</sub> O <sub>10</sub> (OH)                         | 5            | 5           | <5?         | <5          | <5          | <5          |
| Clinoamphibole       | Ca <sub>2</sub> (Mg,Fe) <sub>5</sub> Si <sub>8</sub> O <sub>22</sub> (OH) <sub>2</sub>    | <5           | 5           | 7           | <5          | 5           | <5          |
| Sillimanite          | Al <sub>2</sub> SiO <sub>5</sub>                                                          | —            | —           | —           | —           | —           | —           |
| "Unidentified"       | ?                                                                                         | <5           | <5          | <5          | <5          | <5          | <5          |

Analysis performed by The Mineral Lab, Inc

| Mineral Name         | Chemical Formula                                                                          | Approx. Wt % |          |          |          |          |          |
|----------------------|-------------------------------------------------------------------------------------------|--------------|----------|----------|----------|----------|----------|
|                      |                                                                                           | NS36 25'     | NS36 45' | NS36 52' | NS37 35' | NS37 45' | NS37 65' |
| Quartz               | SiO <sub>2</sub>                                                                          | 52           | 53       | 54       | 49       | 46       | 46       |
| Plagioclase feldspar | (Na,Ca)Al(Si,Al) <sub>3</sub> O <sub>8</sub>                                              | 24           | 22       | 24       | 24       | 23       | 24       |
| K-feldspar           | KAlSi <sub>3</sub> O <sub>8</sub>                                                         | 12           | 10       | 10       | 10       | 11       | 11       |
| Mica/illite          | (K,Na,Ca)(Al,Mg,Fe) <sub>2</sub> (Si,Al) <sub>4</sub> O <sub>10</sub> (OH,F) <sub>2</sub> | 5            | 5        | 6        | 7        | 8        | 8        |
| Chlorite             | (Mg,Fe,Al) <sub>6</sub> (Si,Al) <sub>4</sub> O <sub>10</sub> (OH)                         | <5?          | <5       | —        | <5?      | <5       | <5       |
| Clinoamphibole       | Ca <sub>2</sub> (Mg,Fe) <sub>5</sub> Si <sub>8</sub> O <sub>22</sub> (OH) <sub>2</sub>    | <3           | <5       | <5       | 7        | 7        | 5        |
| Sillimanite          | Al <sub>2</sub> SiO <sub>5</sub>                                                          | —            | —        | —        | —        | —        | —        |
| "Unidentified"       | ?                                                                                         | <5           | <5       | <5       | <5       | <5       | <5       |

Analysis performed by The Mineral Lab, Inc
